# Supplementary material
Source: PubMed Central journal article supplement (PMC2897174)
Supplement: NIHMS194035-supplement-Supplement.pdf [file NIHMS194035-supplement-Supplement.pdf]

## Supplementary Appendix

This appendix has been provided by the authors to give readers additional information about their work.

Supplement to: Steidl C, Lee T, Shah SP, et al. Tumor-associated macrophages and survival in classic Hodgkin's lymphoma. *N Engl J Med* 2010;362:875-85.

**Supplementary material to manuscript “Tumor-Associated Macrophages and Survival in Classic Hodgkin’s Lymphoma” (Steidl et al.)**

**Supplemental Methods**

Follow-up and risk stratification of patients:

In the gene expression cohort, the median follow-up time of living patients with treatment success was 3.9 years (range 0.5-21.0 years). In the immunohistochemistry group, median follow-up time was 4.0 years (range 0.5-20.8 years). For risk stratification according to the IPS, patients were dichotomized into two risk strata: low-risk group 0-3 points, high-risk group 4-7 points. For cases with missing variables normalized incomplete scores were calculated.

Gene expression analysis:

GEP were obtained using GeneChip HG 133 2.0 plus arrays (Affymetrix Inc., U.S.A) containing 54,120 probe sets for genome-wide analysis of the human transcriptome. Total RNA was extracted from multiple (10-20x) 20µm freshly cut tissue sections after mechanical homogenization using Allprep RNA extraction kits (Qiagen Inc., ON, Canada). 1-8 µg of extracted RNA were subsequently used to prepare biotinylated cRNA in a one-cycle reaction following routine protocols including reverse transcription and labeling in-vitro transcription reactions. 11µg of labeled cRNA were then hybridized on the array overnight and the arrays were washed, stained and scanned using Affymetrix Fluidics Station 450 and Affymetrix GeneChip Scanner. All 130 reported

microarrays passed homogeneous criteria for testing quality control including present call rates >20% and normalized unscaled standard errors <1.05 (NUSE). Thirteen microarrays were excluded from analysis.

### Data processing and statistical analysis

GE data was pre-processed and normalized by Robust Multichip Average (RMA) in R using Bioconductor.<sup>1</sup> To correct for any batch effects arising from combining the 100 samples from Vancouver and 30 from Nebraska, the COMBAT software written in R was used<sup>2</sup>. The correction was validated using Globaltest in Bioconductor, where the variable tested was “Microarray source”. A p-value of 0.00287 indicating significant differences between microarrays of different sources was corrected to 0.721 after batch adjustment. The last pre-processing step was global pre-filtering of probe sets, based on log<sub>2</sub> intensity of 3 in 25% of cases. This resulted in 25,388 probe sets remaining for further analyses. Differentially expressed genes between treatment outcome groups were identified using 2-sample t-statistics (Bioconductor) and fold change. Raw p-values and false discovery rate (FDR) adjusted p-values according to Benjamini and Hochberg were reported.<sup>3</sup> FDR values below 0.10 (raw p < 0.00123) were considered significant. For unsupervised clustering we used 14,834 probe sets (27.1%) that were expressed with log-intensities ≥4 in ≥ 50% of cases. Overrepresentation and pathway analysis was performed using Ingenuity Pathway Analysis (Ingenuity® Systems, [www.ingenuity.com](http://www.ingenuity.com)). Differentially expressed genes were studied separately according to over- and under-expression in the treatment failure group. Associative testing of gene

signatures and treatment outcome groups were performed using Globaltest version 4.6.0 (Bioconductor). Raw, unadjusted p-values < 0.05 were reported as significant.

#### Immunohistochemistry and TMA construction:

1.5mm duplicate cores were obtained from representative areas containing HRS cells of 166 diagnostic biopsies of cHL, evaluated by both morphology and IHC stains performed for routine-diagnostic purposes. TMA sections were stained for CD68 (Dako, KP1), MMP11 (Abcam, ab52904), CD20 (Dako, L26), CD3 (polyclonal, Cell Marque) and CD30 (Dako, Ber-H2) following routine protocols for automated immunohistochemistry on the Ventana Benchmark XT (Ventana Medical Systems, Tucson, Arizona). The slides were independently scored by RDG, GH and PF. For CD68 staining, cells were scored in three representative high-power fields (tumor cell regions) and the relative percentage of CD68+ cells in relation to overall cellularity was reported as an average of both duplicate cores according to four groups: <5% IHC score 1, 5-25% IHC score 2, >25-50% IHC score 3 and > 50% IHC score 4. However, there were only eight cases with > 50% CD68+ macrophages and thus this latter group was merged with cases showing 25-50% (IHC score 3). Elevated numbers of CD68+ cells were defined as IHC scores 2 and 3 according to a threshold of 5% established on 5 benign tonsil controls and previous studies<sup>4</sup>. Subgroup analysis of limited-stage cHL patients included a total of 41 cases. Due to the small sample size in IHC scoring groups 3 & 4 (n = 5 and n = 1, respectively), these groups were merged with IHC score group 2 (n = 17) for the purposes of DSS analysis. Discrepant cases were centrally reviewed to reach consensus. To control for case to case histologic variability, areas of

sclerosis, necrosis and presence of primary or secondary lymphoid follicles, we recorded: 1) HRS cell CD20 positivity 2) positivity of the surrounding reactive small B cells only (excluding sclerotic areas and follicles) and 3) presence of B cell follicles. MMP11 staining was recorded as the overall cellularity of MMP11+ cells: IHC score 0 (no positivity), IHC score 1 (<1% of cells), IHC score 2 (1-10% of cells) and IHC score 3 (>10% of cells). Positive cells included Reed-Sternberg cells, macrophages and microvessels.

#### Predictive models:

We trained a classifier using sparse multinomial logistic regression (SMLR). Our aim was to build a robust discriminative model that is predictive of treatment failure in addition to identifying a small set of features (genes) that are able to separate the data into the respective outcome groups. SMLR imposes a sparsity promoting prior distribution that models whether a gene should be considered in the construction of the classifier. As such, the model heavily penalizes a gene for being included in the feature set, resulting in a small set of discriminative features that are strongly supported by the data. SMLR performs feature selection and classification simultaneously.<sup>5</sup> We trained an SMLR classifier using leave-one-out cross validation (LOOCV) analyzing pretreatment data of the 130 patients with diagnostic lymph node biopsies. For feature selection in the training sets we also included the 7 clinical variables as defined in the IPS (age, Ann Arbor stage, sex, albumin, absolute lymphocyte count, lymphocyte percentage and hemoglobin) in addition to the 25,388 gene expression probe sets. We measured classification accuracy using a Receiver Operator Characteristic (ROC)

curve, the Area under Curve (AUC), the confusion matrix and class-specific error rates. The outcome failure (F) was assigned to be the positive class and outcome success (S) the negative class, leading to the following definitions: prediction F, true F = true positive (TP); prediction F, true S = false positive (FP); prediction S, true F = false negative (FN); prediction S, true S = true negative (TN).

We compared three types of input data with respect to predictor performance: gene expression data only, clinical variables only, combination of the two.

For determining relative variable importance we created Random Forests (RF)<sup>6</sup> using the SMLR selected features. Following settings were used: number of predictors considered for each node: square root (number of input variables), number of trees to build: 10,000, class weights: balanced. A ranked list of these variables (relative variable importance) was plotted using the standard method, which is based on randomizing of the variable values and measuring the resultant decline in model accuracy.

**Figure S1:** Gene expression study cohort of 130 patients with classical Hodgkin lymphoma. Dichotomy of comparison groups according to clinical extremes: primary treatment success vs failure

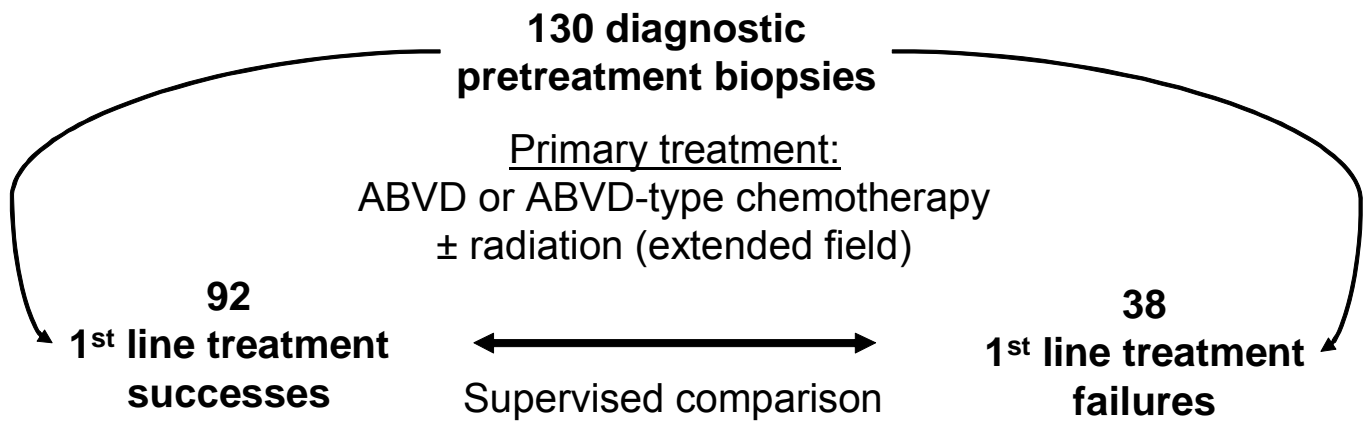





B. Adipocyte signature<sup>8</sup>:

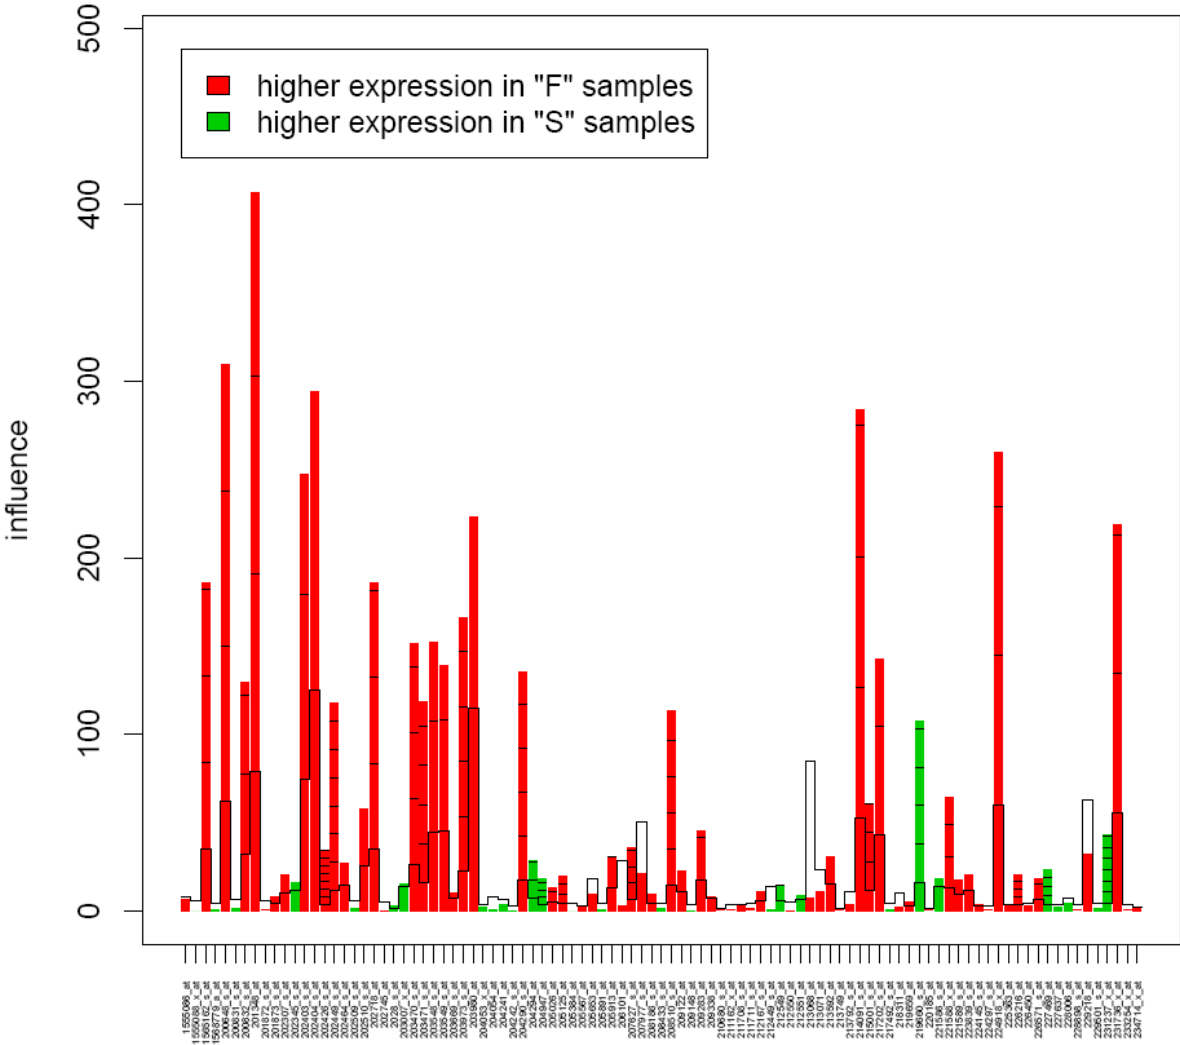

C. Tumor-associated macrophage signature<sup>9</sup>:

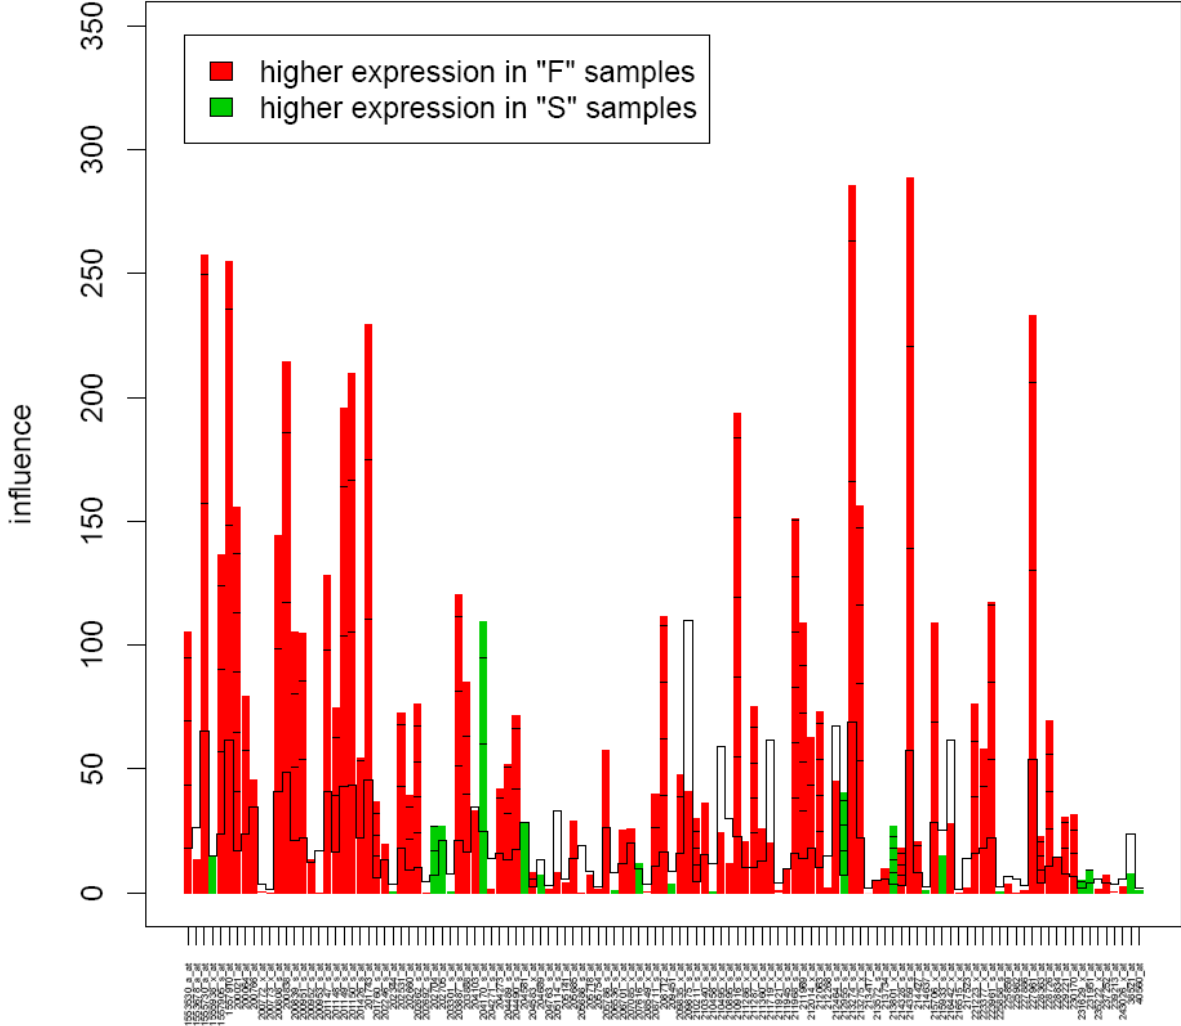

D. Resting monocyte signature<sup>10</sup>:

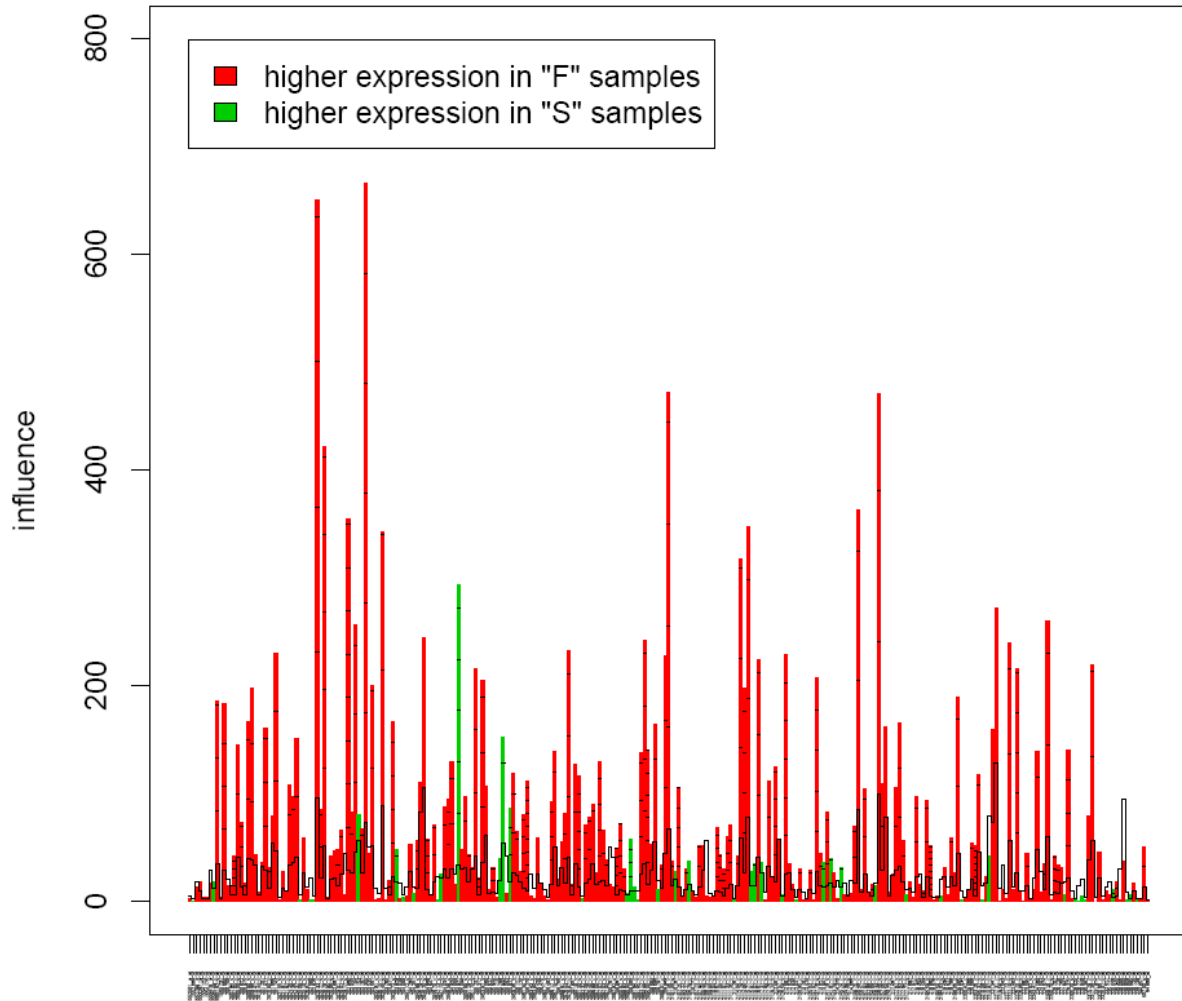

**Supplementary table S1:** Association of previously described gene signatures with treatment outcome: Results of Global Test. Signatures with p-values < 0.05 are shown.

| <b>Name of signature</b>                            | <b># of probe sets</b> | <b>Reference</b>                                     | <b>Primary treatment outcome: success (92) vs. failure (38)</b> | <b>Most influential genes in signature</b> |
|-----------------------------------------------------|------------------------|------------------------------------------------------|-----------------------------------------------------------------|--------------------------------------------|
| All genes                                           | 25388                  | Affymetrix UA 133 2.0 Plus                           | 0.020                                                           | -                                          |
| Comparison I: primary treatment failure vs success  | 315                    | present study                                        | 1.56x10 <sup>-6</sup>                                           | DDX3Y, HRH1, PYGL, ETS2, LHFP              |
| Microenvironment: Up-regulated in treatment failure | 194                    | Sanchez-Aguilera et al., Blood 2006 <sup>11</sup>    | 0.036                                                           | FKBP5, LYZ, ARF3, CTSL1                    |
| Resting NK cells                                    | 97                     | Su et al., PNAS 2004 <sup>10</sup>                   | 0.031                                                           | FCGR3A, FCGR3B, ADAMTS1, APOL1, LAIR1      |
| Germinal center B cells (GCB)                       | 497                    | Dave et al., NEJM 2006 <sup>12</sup>                 | 0.012                                                           | RGS13, CR2, ELL3, CCDC23                   |
| Erythroid progenitors                               | 287                    | Su et al., PNAS 2004 <sup>10</sup>                   | 0.029                                                           | TGM2, GLUL, ITSN1, AQP1, FLII              |
| Tumor-associated macrophages                        | 117                    | Duff et al., J Surg Res 2007 <sup>9</sup>            | 0.017                                                           | HSP90AB3P, HSP90AB1, CTSB, CFL1            |
| Adipocyte                                           | 97                     | Urs et al., J Nutr 2004 <sup>8</sup>                 | 0.012                                                           | GLUL, MGST1, COL1A2, FABP4                 |
| Plasmacytoid dendritic cells (CD123+)               | 507                    | Lindstedt et al., J Immunol 2005 <sup>13</sup>       | 0.046                                                           | SRPX, CTSB, APP                            |
| Angiogenesis                                        | 108                    | Lenz et al, NEJM 2008 <sup>7</sup>                   | 0.036                                                           | ADH1B, CD93, SRPX, PLA2G2A                 |
| HRS cells                                           | 26                     | Karube et al., Annals of Oncology 2006 <sup>14</sup> | 0.047                                                           | CSF1R, TNFSF12, TNFSF13, CCL26, TNFSF12    |
| Macrophages                                         | 153                    | Martinez et al., J Immunology 2006 <sup>15</sup>     | 0.022                                                           | CCL13, MS4A4A, CCL23, VCAN                 |
| Resting monocytes                                   | 279                    | Su et al., PNAS 2004 <sup>10</sup>                   | 0.014                                                           | F13A1, SERPINA1, LILRB2, VCAN, CD93        |
| TGFβ                                                | 108                    | Kang et al., Mol Cell 2003 <sup>16</sup>             | 0.046                                                           | SLC39A8, P4HB, CYP1B1, HYOU1, PEA15        |

Based on the chosen threshold (FDR <0.1), we found 315 probe sets, corresponding to 271 genes, of which 99 were up-regulated (range of fold change: 1.11 – 1.85) and 172 down-regulated (range of fold change: 1.09 – 2.45) in the treatment failure specimens

**Supplementary table S2: Differentially expressed genes upregulated in primary treatment failures**

| Probe set   | Gene name | Accession | Unigene   | Fold change | t-test     | p value (BH) |
|-------------|-----------|-----------|-----------|-------------|------------|--------------|
| 205579_at   | HRH1      | NM_000861 | Hs.1570   | 1.85326961  | 0.00050318 | 0.078374371  |
| 205001_s_at | DDX3Y     | AF000985  | Hs.99120  | 1.81999456  | 0.00116307 | 0.098766639  |
| 202990_at   | PYGL      | NM_002863 | Hs.282417 | 1.67835322  | 0.00087501 | 0.091749041  |
| 201328_at   | ETS2      | AL575509  | Hs.644231 | 1.58559345  | 3.15E-05   | 0.033668997  |
| 211936_at   | HSPA5     | AF216292  | Hs.605502 | 1.46375846  | 4.79E-05   | 0.036882453  |
| 208744_x_at | HSPH1     | BG403660  | Hs.36927  | 1.44735275  | 0.00056662 | 0.081272377  |
| 219952_s_at | MCOLN1    | NM_020533 | Hs.631858 | 1.41880364  | 0.00096727 | 0.09555248   |
| 200841_s_at | EPRS      | AI142677  | Hs.497788 | 1.40329156  | 0.0007492  | 0.089203621  |
| 208980_s_at | UBC       | M26880    | Hs.520348 | 1.40123566  | 0.0010492  | 0.098656287  |
| 217967_s_at | FAM129A   | AF288391  | Hs.518662 | 1.38122415  | 0.00086376 | 0.091749041  |
| 201562_s_at | SORD      | NM_003104 | Hs.878    | 1.37260388  | 0.00071388 | 0.089012925  |
| 233587_s_at | SIPA1L2   | AK022852  | Hs.268774 | 1.34365584  | 0.00020268 | 0.059215133  |
| 202290_at   | PDAP1     | NM_014891 | Hs.632296 | 1.34216119  | 0.00022545 | 0.059215133  |
| 214438_at   | HLX       | M60721    | Hs.74870  | 1.33083744  | 0.00039087 | 0.073506049  |
| 215764_x_at | AP2A2     | AA877641  | Hs.19121  | 1.32927195  | 0.00083005 | 0.091622871  |
| 218656_s_at | LHFP      | NM_005780 | Hs.507798 | 1.32853009  | 0.00014406 | 0.056702817  |
| 208658_at   | PDIA4     | BC000425  | Hs.93659  | 1.32330225  | 0.00091837 | 0.093753425  |
| 229748_x_at | LOC389833 | AI380156  | Hs.487562 | 1.31306273  | 0.00112303 | 0.098766639  |
| 201218_at   | CTBP2     | N23018    | Hs.501345 | 1.31035401  | 0.00054096 | 0.079848534  |
| 200021_at   | CFL1      | NM_005507 | Hs.170622 | 1.30982796  | 0.00112127 | 0.098766639  |
| 200602_at   | APP       | NM_000484 | Hs.706742 | 1.30681764  | 0.00112321 | 0.098766639  |
| 206278_at   | PTAFR     | D10202    | Hs.433540 | 1.29673093  | 0.00037933 | 0.071868134  |
| 200895_s_at | FKBP4     | NM_002014 | Hs.524183 | 1.28825821  | 0.0011594  | 0.098766639  |
| 221565_s_at | FAM26B    | BC000039  | Hs.241545 | 1.27355229  | 0.00014713 | 0.056702817  |
| 222883_at   | C1orf163  | NM_023077 | Hs.584966 | 1.27259204  | 8.19E-06   | 0.02512121   |
| 202972_s_at | FAM13A1   | AW450403  | Hs.708044 | 1.26059155  | 0.0002944  | 0.064602987  |
| 396_f_at    | EPOR      | X97671    | Hs.631624 | 1.25879139  | 4.36E-06   | 0.02512121   |
| 201160_s_at | CSDA      | AL556190  | Hs.221889 | 1.25671023  | 3.64E-05   | 0.033668997  |
| 239648_at   | DCUN1D3   | AI765327  | Hs.101007 | 1.25469702  | 0.00049059 | 0.077361389  |
| 215434_x_at | NBPF10    | AV684285  | Hs.515947 | 1.25419432  | 0.00022223 | 0.059215133  |
| 208757_at   | TMED9     | BC001123  | Hs.279929 | 1.25318149  | 1.18E-05   | 0.02512121   |
| 212360_at   | AMPD2     | AI916249  | Hs.82927  | 1.25296285  | 0.00012385 | 0.053088367  |
| 223658_at   | KCNK6     | AF134149  | Hs.240395 | 1.25208322  | 0.00067452 | 0.086695267  |
| 200616_s_at | KIAA0152  | BC000371  | Hs.507074 | 1.25137228  | 0.00122449 | 0.099492613  |
| 1568658_at  | LOC339804 | BU069195  | Hs.140617 | 1.24722139  | 0.00074208 | 0.089203621  |
| 211990_at   | HLA-DPA1  | M27487    | Hs.347270 | 1.24585944  | 0.00024894 | 0.06019139   |

|              |           |           |           |            |            |             |
|--------------|-----------|-----------|-----------|------------|------------|-------------|
| 235964_x_at  | C20orf118 | AA603344  | Hs.472630 | 1.24493115 | 0.00107188 | 0.098766639 |
| 212517_at    | ATRN      | AL132773  | Hs.276252 | 1.24426369 | 0.00072089 | 0.089012925 |
| 214709_s_at  | KTN1      | Z22551    | Hs.509414 | 1.24184665 | 5.27E-06   | 0.02512121  |
| 201138_s_at  | SSB       | BG532929  | Hs.632535 | 1.23826027 | 0.00118727 | 0.099152736 |
| 205196_s_at  | AP1S1     | NM_001283 | Hs.489365 | 1.23711331 | 0.00110486 | 0.098766639 |
| 221196_x_at  | BRCC3     | NM_024332 | Hs.558537 | 1.23322335 | 0.00059763 | 0.083826486 |
| 203598_s_at  | WBP4      | AK000979  | Hs.411300 | 1.23151015 | 8.22E-05   | 0.045391733 |
| 211257_x_at  | ZNF638    | AF273049  | Hs.434401 | 1.22943283 | 0.00094753 | 0.094336333 |
| 1569057_s_at | MIA3      | BC031805  | Hs.118474 | 1.22569834 | 0.0008283  | 0.091622871 |
| 220734_s_at  | LOC727825 | NM_030575 | NA        | 1.22244948 | 0.00012529 | 0.053088367 |
| 203112_s_at  | WHSC2     | NM_005663 | Hs.21771  | 1.21923678 | 0.00032081 | 0.0665277   |
| 212495_at    | JMJD2B    | BE256900  | Hs.654816 | 1.21589933 | 0.00105371 | 0.098714268 |
| 221653_x_at  | APOL2     | BC004395  | Hs.474740 | 1.21363006 | 0.00072576 | 0.089012925 |
| 225639_at    | SKAP2     | N21390    | Hs.200770 | 1.20986748 | 0.00098819 | 0.096200079 |
| 218436_at    | SIL1      | NM_022464 | Hs.483521 | 1.20827352 | 0.00064013 | 0.085316284 |
| 225011_at    | PRKAR2A   | AK026351  | Hs.631923 | 1.20700879 | 0.00053761 | 0.079848534 |
| 212116_at    | TRIM27    | NM_006510 | Hs.440382 | 1.20412544 | 0.00053927 | 0.079848534 |
| 223195_s_at  | SESN2     | BF131886  | Hs.469543 | 1.20304504 | 0.00010722 | 0.050408712 |
| 227430_at    | ZC3H10    | AI969773  | Hs.632706 | 1.20247426 | 0.00012998 | 0.054095349 |
| 205641_s_at  | TRADD     | NM_003789 | Hs.460996 | 1.20148734 | 3.38E-05   | 0.033668997 |
| 200874_s_at  | NOL5A     | BE796327  | Hs.376064 | 1.20099459 | 0.00064186 | 0.085316284 |
| 201545_s_at  | PABPN1    | NM_004643 | Hs.117176 | 1.2005158  | 0.00086303 | 0.091749041 |
| 207270_x_at  | CD300C    | NM_006678 | Hs.2605   | 1.19998951 | 0.00022624 | 0.059215133 |
| 220326_s_at  | FLJ10357  | NM_018071 | Hs.35125  | 1.19527808 | 0.00079201 | 0.089765343 |
| 202065_s_at  | PPFIA1    | BG033593  | Hs.530749 | 1.19507504 | 0.00052733 | 0.079848534 |
| 225038_s_at  | SURF6     | AI745183  | Hs.274430 | 1.19502314 | 0.00121519 | 0.099492613 |
| 222200_s_at  | BSDC1     | AK021440  | Hs.353454 | 1.19388957 | 0.00041027 | 0.073872559 |
| 213491_x_at  | RPN2      | AL514285  | Hs.370895 | 1.19327318 | 0.00074906 | 0.089203621 |
| 203773_x_at  | BLVRA     | NM_000712 | Hs.488143 | 1.19317843 | 0.00063309 | 0.085316284 |
| 212723_at    | JMJD6     | AK021780  | Hs.514505 | 1.18963566 | 0.00027687 | 0.062759913 |
| 201327_s_at  | CCT6A     | NM_001762 | Hs.82916  | 1.18924954 | 0.00040161 | 0.073872559 |
| 204104_at    | SNAPC2    | NM_003083 | Hs.631860 | 1.18668957 | 0.00018567 | 0.059029899 |
| 231846_at    | FOXRED2   | AK026975  | Hs.387601 | 1.18431776 | 0.00113726 | 0.098766639 |
| 212953_x_at  | CALR      | BE251303  | Hs.515162 | 1.18414591 | 0.00016879 | 0.059029899 |
| 38964_r_at   | WAS       | U12707    | Hs.2157   | 1.18368424 | 0.00104709 | 0.098656287 |
| 241706_at    | CPNE8     | AA431782  | Hs.40910  | 1.18222817 | 0.00115777 | 0.098766639 |
| 204968_at    | C6orf47   | NM_021184 | Hs.247323 | 1.17799504 | 0.00024029 | 0.059526355 |
| 1567013_at   | NFE2L2    | AF323119  | Hs.155396 | 1.17537586 | 0.00093429 | 0.093753425 |
| 201557_at    | VAMP2     | NM_014232 | Hs.25348  | 1.17319481 | 0.0003725  | 0.071643845 |
| 227374_at    | EARS2     | AA833716  | Hs.696113 | 1.17149424 | 2.96E-05   | 0.033668997 |
| 226857_at    | ARHGEF19  | AW170520  | Hs.591532 | 1.1712303  | 0.00088152 | 0.091749041 |
| 235810_at    | ZNF182    | AI225224  | Hs.189690 | 1.17066055 | 0.00104478 | 0.098656287 |
| 212678_at    | NF1       | AW054826  | Hs.113577 | 1.16934995 | 0.00121252 | 0.099492613 |
| 218305_at    | IPO4      | NM_024658 | Hs.411865 | 1.16758933 | 0.00085949 | 0.091749041 |
| 229940_at    | SETD3     | BF448048  | Hs.510407 | 1.16324319 | 0.00120273 | 0.099492613 |
| 228452_at    | C17orf39  | AA827865  | Hs.187422 | 1.16319022 | 0.00110886 | 0.098766639 |
| 202426_s_at  | RXRA      | BE675800  | Hs.590886 | 1.15429438 | 0.00101492 | 0.096780767 |
| 227151_at    | SNX33     | BE464841  | Hs.8705   | 1.15066916 | 0.00099656 | 0.096200079 |
| 224434_s_at  | MORG1     | BC005870  | Hs.657204 | 1.14950591 | 0.00044506 | 0.0758362   |
| 222647_at    | SLC35C1   | BC001427  | Hs.12211  | 1.14531187 | 0.00092084 | 0.093753425 |

|             |          |           |           |            |            |             |
|-------------|----------|-----------|-----------|------------|------------|-------------|
| 203488_at   | LPHN1    | NM_014921 | Hs.654658 | 1.14308961 | 8.67E-05   | 0.045391733 |
| 40850_at    | FKBP8    | L37033    | Hs.173464 | 1.14157722 | 0.00027264 | 0.062759913 |
| 204413_at   | TRAF2    | NM_021138 | Hs.522506 | 1.13714867 | 0.00117876 | 0.098766639 |
| 223365_at   | DHX37    | BC004463  | Hs.107382 | 1.13689555 | 8.76E-05   | 0.045391733 |
| 217776_at   | RDH11    | AF167438  | Hs.226007 | 1.13663895 | 0.00076401 | 0.089385311 |
| 217205_at   | CCDC129  | Y08772    | Hs.224269 | 1.13203871 | 0.00122272 | 0.099492613 |
| 31861_at    | IGHMBP2  | L14754    | Hs.503048 | 1.13118871 | 4.96E-05   | 0.036999761 |
| 219417_s_at | C17orf59 | NM_017622 | Hs.129563 | 1.13015825 | 0.00040262 | 0.073872559 |
| 40255_at    | DDX28    | AC004531  | Hs.458313 | 1.12623536 | 0.0002818  | 0.063311987 |
| 221187_s_at | FUZ      | NM_025129 | Hs.288800 | 1.12621501 | 0.00044325 | 0.0758362   |
| 205441_at   | OCEL1    | NM_024578 | Hs.422676 | 1.12334939 | 0.00018318 | 0.059029899 |
| 220605_s_at | SIRT2    | NM_012237 | Hs.466693 | 1.11677479 | 0.0001988  | 0.059215133 |
| 210160_at   | PAFAH1B2 | BC000398  | Hs.696131 | 1.11290317 | 0.00109169 | 0.098766639 |

### Supplementary table S3: Differentially expressed genes downregulated in primary

treatment failures

| Probe set   | Gene name  | Accession | Unigene   | Fold change | t-test     | p value (BH) |
|-------------|------------|-----------|-----------|-------------|------------|--------------|
| 204450_x_at | APOA1      | NM_000039 | Hs.633003 | 1.08823417  | 0.00121339 | 0.099492613  |
| 243228_at   | GTF3C4     | BF980709  | Hs.656646 | 1.08998422  | 0.00034464 | 0.06889468   |
| 213347_x_at | RPS4X      | AW132023  | Hs.446628 | 1.09941179  | 0.00114473 | 0.098766639  |
| 1568590_at  | ARL3       | BU619321  | Hs.182215 | 1.10078537  | 0.00044386 | 0.0758362    |
| 234751_s_at | NLGN3      | AF217413  | Hs.438877 | 1.10784897  | 0.00025944 | 0.061483391  |
| 227879_at   | ALKBH7     | AI245026  | Hs.111099 | 1.1100844   | 0.00031228 | 0.066068984  |
| 1561127_at  | C10orf109  | AF086274  | Hs.568831 | 1.11529943  | 0.00021036 | 0.059215133  |
| 239855_at   | PPM1L      | AI692675  | Hs.389027 | 1.11711547  | 0.00057725 | 0.082331942  |
| 211279_at   | NRF1       | L22454    | Hs.654363 | 1.1172822   | 0.00116867 | 0.098766639  |
| 200088_x_at | RPL12      | AK026491  | Hs.408054 | 1.11798219  | 0.00111921 | 0.098766639  |
| 213466_at   | RAB40C     | BE965869  | Hs.459630 | 1.11857982  | 0.00075191 | 0.089203621  |
| 223653_x_at | BRUNOL4    | AW593887  | Hs.435976 | 1.11858433  | 0.00050628 | 0.078374371  |
| 209985_s_at | ASCL1      | BE797438  | Hs.707985 | 1.12096974  | 0.0002921  | 0.064602987  |
| 225596_at   | KLC4       | AW080609  | Hs.655123 | 1.12226759  | 0.00067722 | 0.086695267  |
| 234696_at   | LOC138652  | AL136097  | NA        | 1.12227167  | 1.39E-05   | 0.025229048  |
| 221240_s_at | B3GNT4     | NM_030765 | Hs.363315 | 1.12329129  | 0.00055897 | 0.080630633  |
| 240742_at   | LOC650656  | AI218924  | NA        | 1.12339152  | 5.42E-05   | 0.038249644  |
| 223740_at   | RIPPLY2    | AL136708  | Hs.664873 | 1.12389088  | 0.00085068 | 0.091749041  |
| 213321_at   | BCKDHB     | AL531533  | Hs.654441 | 1.12517393  | 0.0010585  | 0.098766639  |
| 231272_at   | MED7       | AW295321  | Hs.279902 | 1.12581419  | 0.00021519 | 0.059215133  |
| 229080_at   | EMID2      | BE741432  | Hs.654854 | 1.12669665  | 9.43E-06   | 0.02512121   |
| 219905_at   | ERMAP      | NM_018538 | Hs.439437 | 1.12743476  | 0.00089495 | 0.092361987  |
| 207680_x_at | PAX3       | NM_013942 | Hs.42146  | 1.12997027  | 0.00066281 | 0.086695267  |
| 238265_x_at | METRNL     | BF514885  | Hs.591142 | 1.13217638  | 0.00119921 | 0.099492613  |
| 211691_x_at | OAZ1       | AF293339  | Hs.446427 | 1.13496     | 0.00121756 | 0.099492613  |
| 206097_at   | SLC22A18AS | NM_007105 | Hs.300076 | 1.13607094  | 0.00076215 | 0.089385311  |
| 242048_at   | PFDN6      | BE905316  | Hs.446374 | 1.13688586  | 7.86E-05   | 0.045391733  |
| 221775_x_at | RPL22      | BG152979  | Hs.515329 | 1.1369217   | 0.00021749 | 0.059215133  |
| 229474_at   | MICAL3     | BF055090  | Hs.528024 | 1.13964078  | 0.00045877 | 0.076391192  |

|              |              |           |           |            |            |             |
|--------------|--------------|-----------|-----------|------------|------------|-------------|
| 244028_at    | USP15        | AW629399  | Hs.434951 | 1.13983285 | 0.00093369 | 0.093753425 |
| 202588_at    | AK1          | NM_000476 | Hs.175473 | 1.14543123 | 0.00048655 | 0.077203311 |
| 1553507_a_at | GPR6         | NM_005284 | Hs.46332  | 1.14761367 | 0.00040927 | 0.073872559 |
| 207408_at    | SLC22A14     | NM_004803 | Hs.165559 | 1.14839124 | 0.0001871  | 0.059029899 |
| 227829_at    | GYLTL1B      | AW272738  | Hs.86543  | 1.14943364 | 0.00036694 | 0.071339854 |
| 206709_x_at  | GPT          | NM_005309 | Hs.103502 | 1.14950079 | 7.11E-05   | 0.045391733 |
| 242030_at    | SLC4A1AP     | AI934909  | Hs.306000 | 1.15278215 | 0.00098411 | 0.096200079 |
| 216042_at    | TNFRSF25     | AI275938  | Hs.462529 | 1.15299326 | 0.00012547 | 0.053088367 |
| 231020_at    | ARX          | AI341389  | Hs.300304 | 1.15559733 | 0.0011756  | 0.098766639 |
| 217095_x_at  | NCR1         | AJ006122  | Hs.97084  | 1.15787367 | 0.00015493 | 0.057843937 |
| 220179_at    | DPEP3        | NM_022357 | Hs.302028 | 1.15844131 | 0.00076213 | 0.089385311 |
| 220086_at    | IKZF5        | NM_022466 | Hs.501289 | 1.1585181  | 8.11E-05   | 0.045391733 |
| 210530_s_at  | NR2C1        | M21985    | Hs.108301 | 1.15862711 | 0.0008475  | 0.091749041 |
| 206430_at    | CDX1         | NM_001804 | Hs.1545   | 1.16077864 | 0.00018929 | 0.059029899 |
| 1557532_at   | NDUFA7       | AA749262  | Hs.333427 | 1.16235583 | 0.00078776 | 0.089684824 |
| 235908_at    | MMP11        | AW511464  | Hs.143751 | 1.16441778 | 2.35E-05   | 0.033668997 |
| 216342_x_at  | LOC390183    | AL121916  | NA        | 1.1661232  | 0.00123234 | 0.099492613 |
| 219811_at    | DGCR8        | NM_022720 | Hs.643452 | 1.16673227 | 0.00018858 | 0.059029899 |
| 206131_at    | CLPS         | NM_001832 | Hs.1340   | 1.1679669  | 3.44E-07   | 0.008742804 |
| 1559061_at   | LOC253962    | BC041476  | Hs.558704 | 1.16965839 | 4.65E-05   | 0.036882453 |
| 208672_s_at  | SFRS3        | BC000914  | Hs.405144 | 1.16967679 | 0.00050452 | 0.078374371 |
| 1569206_at   | TCP11L2      | BC017872  | Hs.696047 | 1.17025082 | 0.00043689 | 0.0758362   |
| 242356_at    | VTI1A        | BE613520  | Hs.194554 | 1.17047465 | 0.00041009 | 0.073872559 |
| 209460_at    | ABAT         | AF237813  | Hs.336768 | 1.17063794 | 0.00081691 | 0.091622871 |
| 209746_s_at  | COQ7         | AF032900  | Hs.157113 | 1.17200346 | 0.00023342 | 0.059260984 |
| 244063_at    | BTN2A1       | AW235118  | Hs.159028 | 1.17338314 | 0.00074087 | 0.089203621 |
| 228208_x_at  | ZNF354C      | AL134573  | Hs.445740 | 1.17647457 | 0.00098631 | 0.096200079 |
| 1553857_at   | IGSF22       | NM_173588 | Hs.434152 | 1.17789261 | 9.00E-05   | 0.04569847  |
| 228870_at    | FAM84B       | BF732683  | Hs.124951 | 1.17821038 | 0.00060841 | 0.084296206 |
| 208234_x_at  | FGFR2        | NM_022976 | Hs.533683 | 1.17839428 | 0.00043104 | 0.0758362   |
| 230955_s_at  | C20orf112    | AL034550  | Hs.516978 | 1.18005804 | 0.00015076 | 0.057126803 |
| 231237_x_at  | E2F5         | BF434182  | Hs.445758 | 1.18185685 | 0.00077216 | 0.089514015 |
| 223766_at    | LOC100133130 | AF130105  | Hs.662127 | 1.18557825 | 0.00019921 | 0.059215133 |
| 221025_x_at  | PUS7L        | NM_031292 | Hs.445814 | 1.18695978 | 1.29E-05   | 0.02512121  |
| 228755_at    | GIGYF1       | NM_022574 | Hs.708210 | 1.18901759 | 0.00092882 | 0.093753425 |
| 226385_s_at  | C7orf30      | BG397444  | Hs.87385  | 1.1905074  | 0.00115642 | 0.098766639 |
| 209510_at    | RNF139       | AF064801  | Hs.632057 | 1.19250155 | 0.00101782 | 0.096780767 |
| 1554063_at   | C8orf76      | BC012379  | Hs.521800 | 1.19351296 | 0.0004526  | 0.076096125 |
| 211125_x_at  | GRIN1        | AF015730  | Hs.558334 | 1.19510985 | 5.36E-05   | 0.038249644 |
| 229891_x_at  | KIAA1704     | AI630799  | Hs.507922 | 1.19823231 | 0.00117809 | 0.098766639 |
| 225281_at    | C3orf17      | AK024325  | Hs.591288 | 1.19857447 | 0.00013402 | 0.05478537  |
| 214980_at    | UBE3A        | AF037219  | Hs.654383 | 1.20339446 | 3.86E-05   | 0.033668997 |
| 212963_at    | TM2D1        | BF968960  | Hs.656790 | 1.20474995 | 0.00115567 | 0.098766639 |
| 1555874_x_at | MGC21881     | BC019880  | Hs.658041 | 1.2054457  | 0.00108593 | 0.098766639 |
| 212243_at    | Gcom1        | BE645501  | Hs.437256 | 1.20603219 | 0.00046216 | 0.076391192 |
| 219448_at    | TMEM70       | BC002748  | Hs.106650 | 1.20929752 | 0.00111229 | 0.098766639 |
| 200949_x_at  | RPS20        | NM_001023 | Hs.8102   | 1.21287814 | 0.00017491 | 0.059029899 |
| 221255_s_at  | TMEM93       | NM_031298 | Hs.30011  | 1.21343023 | 0.00116362 | 0.098766639 |
| 230005_at    | SVIP         | AI742358  | Hs.349096 | 1.21384611 | 0.00114836 | 0.098766639 |
| 227747_at    | MPZL3        | AA772172  | Hs.15396  | 1.2139417  | 0.00026155 | 0.061483391 |



|              |           |           |           |            |            |             |
|--------------|-----------|-----------|-----------|------------|------------|-------------|
| 223763_at    | DTNBP1    | AL136637  | Hs.571148 | 1.21576394 | 0.00077062 | 0.089514015 |
| 225893_at    | RC3H1     | AL589593  | Hs.30258  | 1.21588248 | 0.00043831 | 0.0758362   |
| 226836_at    | SFT2D1    | AA044813  | Hs.487143 | 1.21774814 | 0.00086812 | 0.091749041 |
| 227440_at    | ANKS1B    | AW005572  | Hs.506458 | 1.21802061 | 0.00100281 | 0.096436539 |
| 213195_at    | NOS2A     | AI625844  | Hs.706746 | 1.21862101 | 0.00109111 | 0.098766639 |
| 200019_s_at  | FAU       | NM_001997 | Hs.387208 | 1.21908847 | 0.00048212 | 0.077203311 |
| 235237_at    | LOC203547 | AI740565  | Hs.58633  | 1.21910024 | 0.00022274 | 0.059215133 |
| 217187_at    | MUC5AC    | Z34282    | Hs.534332 | 1.22384194 | 1.67E-05   | 0.028249142 |
| 215022_x_at  | ZNF33B    | BG429214  | Hs.499453 | 1.22726061 | 0.00123445 | 0.099492613 |
| 213893_x_at  | PMS2L1    | AA161026  | Hs.634244 | 1.22749409 | 0.00067297 | 0.086695267 |
| 227416_s_at  | ZCRB1     | BE265803  | Hs.496279 | 1.22845028 | 0.00086629 | 0.091749041 |
| 205019_s_at  | VIPR1     | NM_004624 | Hs.348500 | 1.22937405 | 0.00026652 | 0.0620764   |
| 208544_at    | ADRA2B    | NM_000682 | Hs.247686 | 1.23127639 | 1.33E-06   | 0.016849661 |
| 227447_at    | SKIV2L2   | AA525163  | Hs.274531 | 1.23172537 | 0.00016075 | 0.059029899 |
| 220743_at    | C16orf72  | NM_014117 | Hs.221497 | 1.23404053 | 6.56E-05   | 0.04383725  |
| 240434_at    | ABLIM2    | AW293517  | Hs.233404 | 1.23413524 | 0.00045086 | 0.076096125 |
| 240172_at    | ERGIC2    | AA102332  | Hs.339453 | 1.23426665 | 0.00023154 | 0.059260984 |
| 215100_at    | C6orf105  | AL022724  | Hs.126409 | 1.23464259 | 0.00033908 | 0.068322672 |
| 235130_at    | PANK2     | AV703394  | Hs.516859 | 1.23592178 | 0.00010697 | 0.050408712 |
| 224801_at    | NDFIP2    | AI655642  | Hs.525093 | 1.23911352 | 0.00068296 | 0.086695267 |
| 212283_at    | AGRN      | AI424797  | Hs.273330 | 1.23990401 | 7.84E-06   | 0.02512121  |
| 208697_s_at  | EIF3E     | BC000734  | Hs.405590 | 1.24402151 | 0.00048092 | 0.077203311 |
| 205145_s_at  | MYL5      | NM_002477 | Hs.410970 | 1.24511597 | 0.00036545 | 0.071339854 |
| 1555858_at   | LOC440944 | CA430188  | Hs.598958 | 1.24661708 | 0.00088787 | 0.092005417 |
| 228566_at    | P15RS     | AA778694  | Hs.464912 | 1.25198321 | 0.00011177 | 0.051594931 |
| 203260_at    | HDDC2     | NM_016063 | Hs.32826  | 1.25205948 | 0.00036811 | 0.071339854 |
| 206648_at    | ZNF571    | NM_016536 | Hs.590944 | 1.25404936 | 0.0009941  | 0.096200079 |
| 235193_at    | KIAA1370  | BG036618  | Hs.152385 | 1.25693699 | 9.87E-05   | 0.048196407 |
| 204491_at    | PDE4D     | R40917    | Hs.117545 | 1.2588656  | 0.00074695 | 0.089203621 |
| 227861_at    | TMEM161B  | AI650251  | Hs.379972 | 1.26819884 | 0.00107194 | 0.098766639 |
| 205613_at    | SYT17     | NM_016524 | Hs.258326 | 1.27103944 | 0.00115762 | 0.098766639 |
| 1557360_at   | LRPPRC    | CA430402  | Hs.368084 | 1.27455827 | 0.00062521 | 0.085316284 |
| 218007_s_at  | RPS27L    | NM_015920 | Hs.108957 | 1.27714081 | 0.00063654 | 0.085316284 |
| 226014_at    | EIF3F     | BF115977  | Hs.516023 | 1.28277254 | 0.00078729 | 0.089684824 |
| 222624_s_at  | ZNF639    | AA224199  | Hs.632578 | 1.28450946 | 0.00022368 | 0.059215133 |
| 215731_s_at  | MPHOSPH9  | X98258    | Hs.577404 | 1.28480341 | 0.00091296 | 0.093753425 |
| 227493_s_at  | KIAA1143  | AI863484  | Hs.476082 | 1.2851228  | 0.00099457 | 0.096200079 |
| 1554342_s_at | HEL308    | BC011863  | Hs.480101 | 1.28673423 | 0.00046503 | 0.076391192 |
| 244659_at    | TRIP12    | AL120025  | Hs.591633 | 1.28694529 | 7.65E-05   | 0.045391733 |
| 201447_at    | TIA1      | H96549    | Hs.516075 | 1.2909429  | 0.00060296 | 0.08411     |
| 206572_x_at  | ZNF85     | NM_003429 | Hs.37138  | 1.29229425 | 0.00013595 | 0.05478537  |
| 202694_at    | STK17A    | AW183478  | Hs.706869 | 1.29393045 | 2.85E-05   | 0.033668997 |
| 236321_at    | LOC285550 | AW439843  | Hs.399980 | 1.29575348 | 0.00069322 | 0.087559103 |
| 239975_at    | HLA-DPB2  | BF057731  | Hs.665450 | 1.29604468 | 0.0007771  | 0.08967706  |
| 224664_at    | C10orf104 | BE962336  | Hs.426296 | 1.29894647 | 0.00110471 | 0.098766639 |
| 226838_at    | TTC32     | BE465877  | Hs.591547 | 1.30703441 | 0.00021086 | 0.059215133 |
| 232820_s_at  | GTSF1L    | AI809325  | Hs.447626 | 1.30908364 | 2.35E-06   | 0.019875716 |
| 1569652_at   | MLLT3     | BC030550  | Hs.591085 | 1.32118941 | 6.28E-05   | 0.043096178 |
| 244029_at    | CPNE5     | AW967768  | Hs.657869 | 1.32211654 | 0.00082731 | 0.091622871 |
| 242069_at    | CBX5      | BE568225  | Hs.632724 | 1.33139148 | 0.00061426 | 0.084296206 |

|              |           |           |           |            |            |             |
|--------------|-----------|-----------|-----------|------------|------------|-------------|
| 213528_at    | C1orf156  | AL035369  | Hs.33922  | 1.33145782 | 0.00093081 | 0.093753425 |
| 221046_s_at  | GTPBP8    | NM_014170 | Hs.127496 | 1.34051571 | 0.00070608 | 0.088742586 |
| 231500_s_at  | BOLA2     | AV650728  | Hs.444600 | 1.35546312 | 0.00032523 | 0.066588989 |
| 237442_at    | APBB1IP   | AV699911  | Hs.310421 | 1.35816037 | 0.00011568 | 0.052445512 |
| 230856_at    | WIP11     | AI073396  | Hs.463964 | 1.36022398 | 3.98E-05   | 0.033668997 |
| 214364_at    | MTERFD2   | W84525    | Hs.159556 | 1.36822763 | 3.85E-05   | 0.033668997 |
| 226227_x_at  | C20orf199 | BF185165  | Hs.356766 | 1.37478022 | 0.00072574 | 0.089012925 |
| 235475_at    | SERP1     | AI580135  | Hs.518326 | 1.37773213 | 0.00059563 | 0.083826486 |
| 244600_at    | HGD       | AA868653  | Hs.616526 | 1.38293494 | 0.00066635 | 0.086695267 |
| 213846_at    | COX7C     | AA382702  | Hs.430075 | 1.38911339 | 0.00055142 | 0.080456291 |
| 239142_at    | RFESD     | AI082852  | Hs.399758 | 1.39379544 | 2.04E-05   | 0.0323417   |
| 1552643_at   | ZNF626    | NM_145297 | Hs.657001 | 1.40367788 | 0.00025305 | 0.060608232 |
| 206238_s_at  | YAF2      | NM_005748 | Hs.708084 | 1.41244311 | 0.00048625 | 0.077203311 |
| 235913_at    | LOC400713 | AI285722  | Hs.502314 | 1.42571605 | 0.00021658 | 0.059215133 |
| 213312_at    | C6orf162  | NM_020425 | Hs.70769  | 1.43439634 | 0.00055486 | 0.080495418 |
| 230976_at    | C9orf98   | AW663881  | Hs.421340 | 1.43511069 | 3.59E-05   | 0.033668997 |
| 230871_at    | DHX30     | H67762    | Hs.517948 | 1.44113406 | 0.00122712 | 0.099492613 |
| 1555241_at   | C8orf59   | BC032347  | Hs.443072 | 1.44235612 | 0.00053811 | 0.079848534 |
| 224841_x_at  | CENPL     | BF316352  | Hs.531856 | 1.44401954 | 0.00036753 | 0.071339854 |
| 225534_at    | C8orf40   | AV711345  | Hs.655320 | 1.44611479 | 0.00085093 | 0.091749041 |
| 235780_at    | PRKACB    | BE622723  | Hs.487325 | 1.48006175 | 0.00018137 | 0.059029899 |
| 235048_at    | KIAA0888  | AV720650  | Hs.696414 | 1.48982626 | 1.07E-05   | 0.02512121  |
| 211106_at    | SUPT3H    | AF064804  | Hs.368325 | 1.49013662 | 0.00024385 | 0.059526355 |
| 217988_at    | CCNB1IP1  | NM_021178 | Hs.107003 | 1.49280652 | 0.00017831 | 0.059029899 |
| 216945_x_at  | PASK      | U79240    | Hs.706859 | 1.49792338 | 0.00086885 | 0.091749041 |
| 235389_at    | PHF20     | BG168139  | Hs.517044 | 1.50727397 | 0.0001218  | 0.053088367 |
| 205771_s_at  | AKAP7     | AL137063  | Hs.486483 | 1.53961718 | 0.00067676 | 0.086695267 |
| 225698_at    | C5orf26   | BF314746  | Hs.12082  | 1.54215406 | 3.91E-05   | 0.033668997 |
| 234849_at    | TRA@      | AE000659  | Hs.74647  | 1.54223889 | 4.61E-05   | 0.036882453 |
| 238794_at    | C10orf78  | N23586    | Hs.93667  | 1.54920659 | 0.00017249 | 0.059029899 |
| 235244_at    | CCDC58    | BF001285  | Hs.220594 | 1.55761267 | 0.00030979 | 0.066068984 |
| 205321_at    | EIF2S3    | NM_001415 | Hs.539684 | 1.56697993 | 0.00044508 | 0.0758362   |
| 215082_at    | ELOVL5    | BF973387  | Hs.520189 | 1.57871818 | 0.0004682  | 0.076391192 |
| 228381_at    | ATF7IP2   | AV716964  | Hs.513343 | 1.61412996 | 0.00054839 | 0.080456291 |
| 243602_at    | MGC40069  | AI684979  | Hs.369380 | 1.63248654 | 8.15E-05   | 0.045391733 |
| 214744_s_at  | RPL23     | AK021960  | Hs.406300 | 1.64091909 | 0.00061318 | 0.084296206 |
| 235466_s_at  | DISP1     | AI677948  | Hs.528817 | 1.64298989 | 0.00110203 | 0.098766639 |
| 1557733_a_at | CHRM3     | AI125308  | Hs.7138   | 1.68330687 | 0.00088179 | 0.091749041 |
| 230137_at    | TMEM155   | BF673779  | Hs.27524  | 1.74812025 | 0.00082864 | 0.091622871 |
| 1556667_at   | LOC348751 | BC039445  | Hs.471039 | 1.7772262  | 0.00052451 | 0.079848534 |
| 244798_at    | SERTAD4   | AA398139  | Hs.708143 | 1.77835696 | 9.33E-05   | 0.046427716 |
| 244189_at    | KIAA1648  | AI888657  | Hs.602319 | 1.86102567 | 2.61E-05   | 0.033668997 |
| 205347_s_at  | TMSL8     | NM_021992 | Hs.56145  | 2.45042421 | 0.000182   | 0.059029899 |

## Supplementary table S4:

### A. Ingenuity Pathway Analysis: genes high in primary treatment failures, top 10

#### Functions

| Category                                      | P-value                | Molecules                                                                                                                                                                                                                                                                                      |
|-----------------------------------------------|------------------------|------------------------------------------------------------------------------------------------------------------------------------------------------------------------------------------------------------------------------------------------------------------------------------------------|
| Infectious Disease                            | 1.67E-05<br>- 2.63E-02 | RNPS1, IKBKG, LARS, PRNP, APP, RXRA, CALD1, NMT1, GPT2, PYGL, HLX, ERI2, RPS4Y1, SIPA1L2, ALOX5, IGHMBP2, TRIM8, PFKL, CD44, RBM25 (includes EG:58517), FBLIM1, HLA-C, EPOR, FLJ40125, WBP4, PTGS1, KPNB1, ARHGEF19, ETS2, STIP1, FXR1, HRH1, ZNF182, SSB (includes EG:6741)                   |
| Cell Death                                    | 6E-05-<br>4.68E-02     | PDGFRB, RNPS1, IKBKG, HSP90AA1, PRNP, APP, BLVRA, TRADD, TNFSF13, ALOX5, LILRB1, BRCC3, FKBP8, MUC1, PEA15, CD44, HSPA5, CALR, HSPA1A, PTAFR, SIRT2, ARRB2, FGFR1, PTGS1, MVP, TRIM27, ETS2, PPP5C, CCT6A, APOL1, CTBP2, RASSF4, NFE2L2, TRAF2, FXR1, AP2A2                                    |
| Reproductive System Disease                   | 1.33E-04-<br>4.75E-02  | GABARAPL1, PDGFRB, TXNIP, ATRN, SLC2A5, HSP90AA1, IQGAP1, PRNP, GNAS, RXRA, APP, TRADD, MCAM, COMT, ERI2, ALOX5, SHC1, UBE3A, MUC1, PEA15, CD44, HSPA5, NF1, MINK1, HSPA1A, MAPK7, CDC2L6, HLA-C, EPOR, PTAFR, ARRB2, MMP24, PTGS1, FGFR1, VAMP2, KCNK6, SCN1B, ETS2, CP, PPFIA1, FRMD4A, HRH1 |
| Cell-To-Cell Signaling and Interaction        | 1.42E-04-<br>4.68E-02  | JMJD6, CALR, HSPA1A, PDGFRB, MCAM, CD93, HLA-C, MUC1, CD44, APP                                                                                                                                                                                                                                |
| Cell-mediated Immune Response                 | 1.42E-04-<br>4.37E-02  | CALR, NF1, NFE2L1, PTAFR, HLA-C, CAPZB, ATRN, ARRB2, IQGAP1, PRNP, APP, GNAS, CALD1, JMJD6, PXX, MUC1, CD44, HRH1, WAS                                                                                                                                                                         |
| Cellular Growth and Proliferation             | 1.42E-04-<br>4.59E-02  | PDGFRB, SURF6, TXNIP, IKBKG, DNAJA1, AGGF1, RXRA, MCAM, TNFSF13, FKBP4, RRAD, LZTS2, LILRB1, SHC1, MUC1, CD44, WAS, HSPA5, NF1, CALR, PTAFR, EPOR, HLA-C, SIRT2, C19ORF10, ARRB2, MMP24, PTGS1, FGFR1, MVP, TRIM27, PPP5C, ETS2, PDAP1, RASSF4, UBC, CTBP2, TRAF2                              |
| Hematological System Development and Function | 1.42E-04-<br>4.59E-02  | GNAQ, CALR, HLA-C, PTAFR, EPOR, ATRN, MVP, F13A1, JMJD6, TNFSF13, LILRB1, MUC1, CD44, WAS, HSPA5                                                                                                                                                                                               |
| Cell Signaling                                | 1.73E-04-<br>4.68E-02  | GNAQ, NF1, PPP5C, MINK1, PTAFR, IKBKG, RAB7A, FGFR1, KPNB1, F13A1, APP, MAPK13                                                                                                                                                                                                                 |
| DNA Replication, Recombination, and Repair    | 1.73E-04-<br>1.19E-02  | GNAQ, PTAFR, RAB7A, KPNB1, PRNP                                                                                                                                                                                                                                                                |
| Nucleic Acid Metabolism                       | 1.73E-04-<br>3.53E-02  | GNAQ, ADAP1, PTAFR, SHMT1, RAB7A, KPNB1                                                                                                                                                                                                                                                        |

**B. Ingenuity Pathway Analysis: genes high in primary treatment failures, top 10**

**Canonical Pathways**

| <b>Canonical Pathways</b>                     | <b>-Log(P-value)</b> | <b>Ratio</b> | <b>Molecules</b>                                                  |
|-----------------------------------------------|----------------------|--------------|-------------------------------------------------------------------|
| PPAR Signaling                                | 4.15E00              | 8.05E-02     | PDGFRB, MAPK7, IKBKG, HSP90AA1, TRAF2, SHC1, RXRA                 |
| Androgen Signaling                            | 3.41E00              | 6.09E-02     | GNAQ, CALR, MAPK7, PRKAR2A, HSP90AA1, SHC1, GNAS                  |
| PPAR $\alpha$ /RXR $\alpha$ Activation        | 3.29E00              | 5.19E-02     | GNAQ, MAPK7, PRKAR2A, IKBKG, HSP90AA1, SHC1, RXRA, GNAS           |
| IL-12 Signaling and Production in Macrophages | 2.79E00              | 5.66E-02     | JMJD6, MAPK7, IKBKG, RAB7A, RXRA, MAPK13                          |
| Fructose and Mannose Metabolism               | 2.6E00               | 7.69E-02     | PFKFB2, SORD, PFKL, PFKFB4                                        |
| Glucocorticoid Receptor Signaling             | 2.58E00              | 3.6E-02      | HSPA1A, MAPK7, FKBP4, IKBKG, HSP90AA1, TRAF2, SHC1, HSPA5, MAPK13 |
| Amyloid Processing                            | 2.5E00               | 7.69E-02     | MAPK7, PRKAR2A, APP, MAPK13                                       |
| Acute Phase Response Signaling                | 2.42E00              | 4.17E-02     | TRADD, MAPK7, CP, IKBKG, TRAF2, SHC1, MAPK13                      |
| $\alpha$ -Adrenergic Signaling                | 2.39E00              | 5.56E-02     | GNAQ, PYGL, MAPK7, PRKAR2A, GNAS                                  |

**C. Ingenuity Pathway Analysis: genes low in primary treatment failures, top 10**

**Functions**

| <b>Category</b>                         | <b>P-value</b>    | <b>Molecules</b>                                                                                                                                                                 |
|-----------------------------------------|-------------------|----------------------------------------------------------------------------------------------------------------------------------------------------------------------------------|
| Protein Synthesis                       | 1.3E-05-3.72E-02  | RPS27L (includes EG:51065), APOA1, RPL14, RPL30, RPL38 (includes EG:6169), SQSTM1, RPS4X, MMP11, RPL34, RPL31, EIF2S3, RPL22, RPS17 (includes EG:6218), UBE3A, NACA, GLMN, EIF3E |
| Cell-To-Cell Signaling and Interaction  | 1.26E-04-4.87E-02 | NLGN3, NRD1, NCKIPSD, VIPR1, AGRN, CEACAM5 (includes EG:1048), BRAF, RET                                                                                                         |
| Cellular Assembly and Organization      | 1.26E-04-3.72E-02 | SRPK2, SNRPD1, SNRPD2, NLGN3, MUC5AC, STMN1, APOA1, NRD1, SMC1A, PTMS, AGRN, RET                                                                                                 |
| RNA Post-Transcriptional Modification   | 7.14E-04-1.88E-02 | PAPOLG, RPS16, SRPK2, SNRPD1, BRUNOL4, SNRPD2, RPL14, SNRPN, RPS17 (includes EG:6218), RPS15, U2AF1                                                                              |
| Nervous System Development and Function | 1.04E-03-3.72E-02 | NLGN3, CHRNB2, AGRN                                                                                                                                                              |
| Genetic Disorder                        | 5.01E-03-3.72E-02 | APOA1, ATN1, ASCL1, RET, ARX, ABCB7, PRKAG2, NLGN3, FGFR2, PANK2, CD3D, UBE3A, ADRA2B, DCLRE1C                                                                                   |

|                        |                   |                                                                                       |
|------------------------|-------------------|---------------------------------------------------------------------------------------|
| Neurological Disease   | 5.01E-03-4.14E-02 | ATN1, ASCL1, ARX, RET, SLC1A4, ABCB7, NLGN3, GRIN1, CHRN2, PANK2, ABAT, UBE3A, ADRA2B |
| Respiratory Disease    | 5.01E-03-5.01E-03 | ASCL1, RET                                                                            |
| Hepatic System Disease | 6.79E-03-1.88E-02 | GPT (includes EG:2875), PDE3B, PDE4D                                                  |
| Inflammatory Disease   | 6.79E-03-3.72E-02 | FGFR2, GPT (includes EG:2875), PDE3B, PDE4D                                           |

#### D. Ingenuity Pathway Analysis: genes low in primary treatment failures, top 10

##### Canonical Pathways

| Canonical Pathways                                        | -Log(P-value) | Ratio    | Molecules                                                     |
|-----------------------------------------------------------|---------------|----------|---------------------------------------------------------------|
| Relaxin Signaling                                         | 2.12E00       | 5.65E-02 | RLN1, PRKAG2, PIK3CA, PRKACB, BRAF, PDE3B, PDE4D              |
| cAMP-mediated Signaling                                   | 2.09E00       | 5.06E-02 | PRKACB, BRAF, PDE3B, RGS10, ADRA2B, CREM, PDE4D, AKAP7        |
| Cardiac $\beta$ -adrenergic Signaling                     | 1.62E00       | 5.04E-02 | PPM1L, PRKAG2, PRKACB, PDE3B, PDE4D, AKAP7                    |
| Cellular Effects of Sildenafil (Viagra)                   | 1.47E00       | 4.62E-02 | PRKAG2, MYL5, PRKACB, SLC4A11, PDE3B, PDE4D                   |
| Oxidative Phosphorylation                                 | 1.43E00       | 4.26E-02 | COX7C (includes EG:1350), NDUFA7, COX11, NDUFC1, COX6C, ATP5L |
| G-Protein Coupled Receptor Signaling                      | 1.42E00       | 3.92E-02 | PRKAG2, PIK3CA, PRKACB, BRAF, PDE3B, RGS10, ADRA2B, PDE4D     |
| Nitric Oxide Signaling in the Cardiovascular System       | 1.41E00       | 5.71E-02 | PRKAG2, PIK3CA, PRKACB, PDE3B                                 |
| CTLA4 Signaling in Cytotoxic T Lymphocytes                | 1.23E00       | 4.71E-02 | PPM1L, TRA@, CD3D, PIK3CA                                     |
| Cytotoxic T Lymphocyte-mediated Apoptosis of Target Cells | 1.2E00        | 8E-02    | TRA@, CD3D                                                    |
| Melanocyte Development and Pigmentation Signaling         | 1.13E00       | 4.76E-02 | PRKAG2, PAX3, PIK3CA, PRKACB                                  |

**Supplementary table S5:** SMLR combination model features and their relative importance rankings according to Random Forests (RF)<sup>6</sup> – 86 annotated genes and 2 clinical variables

| Probe set   | Importance | Gene Symbol | Gene Title                                                                                                   |
|-------------|------------|-------------|--------------------------------------------------------------------------------------------------------------|
| 214980_at   | 100.000    | UBE3A       | E6-AP isoform-III                                                                                            |
| 206131_at   | 97.825     | CLPS        | colipase, pancreatic                                                                                         |
| 229080_at   | 72.950     | EMID2       | EMI domain containing 2                                                                                      |
| 232820_s_at | 65.193     | GTSF1L      | gametocyte specific factor 1-like                                                                            |
| 201806_s_at | 63.262     | ATXN2L      | ataxin 2-like                                                                                                |
| 235908_at   | 62.537     | MMP11       | matrix metalloproteinase 11 (stromelysin 3)                                                                  |
| 216114_at   | 60.429     | NCKIPSD     | NCK interacting protein with SH3 domain                                                                      |
| 203112_s_at | 57.592     | WHSC2       | Wolf-Hirschhorn syndrome candidate 2                                                                         |
| 203598_s_at | 55.895     | WBP4        | WW domain binding protein 4 (formin binding protein 21)                                                      |
| 227374_at   | 54.068     | EARS2       | glutamyl-tRNA synthetase 2, mitochondrial (putative)                                                         |
| 219811_at   | 50.678     | DGCR8       | DiGeorge syndrome critical region gene 8                                                                     |
| 207783_x_at | 49.571     | HUWE1       | HECT, UBA and WWE domain containing 1                                                                        |
| 207408_at   | 48.129     | SLC22A14    | solute carrier family 22, member 14                                                                          |
| 200635_s_at | 47.423     | PTPRF       | protein tyrosine phosphatase, receptor type, F                                                               |
| 239648_at   | 44.349     | DCUN1D3     | DCN1, defective in cullin neddylation 1, domain containing 3 ( <i>S. cerevisiae</i> )                        |
| 204491_at   | 44.145     | PDE4D       | phosphodiesterase 4D, cAMP-specific (phosphodiesterase E3 dunce homolog, <i>Drosophila</i> )                 |
| 223740_at   | 43.933     | RIPPLY2     | rippy2 homolog (zebrafish)                                                                                   |
| 217095_x_at | 43.446     | NCR1        | natural cytotoxicity triggering receptor 1                                                                   |
| 219905_at   | 43.325     | ERMAP       | erythroblast membrane-associated protein (Scianna blood group)                                               |
| 209980_s_at | 41.167     | SHMT1       | serine hydroxymethyltransferase 1 (soluble)                                                                  |
| 203488_at   | 40.265     | LPHN1       | latrophilin 1                                                                                                |
| 207270_x_at | 39.822     | CD300C      | CD300c molecule                                                                                              |
| 242048_at   | 39.139     | PFDN6       | prefoldin subunit 6                                                                                          |
| 204952_at   | 38.310     | LYPD3       | LY6/PLAUR domain containing 3                                                                                |
| 204802_at   | 37.767     | RRAD        | Ras-related associated with diabetes                                                                         |
| 218550_s_at | 37.296     | LRRC20      | leucine rich repeat containing 20                                                                            |
| 227249_at   | 37.010     | NDE1        | NudE nuclear distribution gene E homolog 1 ( <i>A. nidulans</i> ), mRNA (cDNA clone MGC:33664 IMAGE:4828494) |
| age         | 36.769     | AGE         | –                                                                                                            |
| 204104_at   | 35.497     | SNAPC2      | small nuclear RNA activating complex, polypeptide 2, 45kDa                                                   |
| 208384_s_at | 35.170     | MID2        | midline 2                                                                                                    |
| 218865_at   | 34.926     | MOSC1       | MOCO sulphurase C-terminal domain                                                                            |

|              |        |          |                                                                                |
|--------------|--------|----------|--------------------------------------------------------------------------------|
|              |        |          | containing 1                                                                   |
| 213693_s_at  | 34.826 | MUC1     | mucin 1, cell surface associated                                               |
| 219525_at    | 34.644 | SLC47A1  | solute carrier family 47, member 1                                             |
| 224839_s_at  | 34.635 | GPT2     | glutamic pyruvate transaminase (alanine aminotransferase) 2                    |
| 236703_at    | 33.557 | NT5C2    | 5'-nucleotidase, cytosolic II                                                  |
| 32062_at     | 33.501 | LRRC14   | leucine rich repeat containing 14                                              |
| 223389_s_at  | 33.280 | ZNF581   | zinc finger protein 581                                                        |
| 229941_at    | 33.255 | FAM166B  | family with sequence similarity 166, member B                                  |
| 209985_s_at  | 33.027 | ASCL1    | achaete-scute complex homolog 1 (Drosophila)                                   |
| 219398_at    | 32.904 | CIDEC    | cell death-inducing DFFA-like effector c                                       |
| 219411_at    | 32.718 | ELMO3    | engulfment and cell motility 3                                                 |
| 221187_s_at  | 31.425 | FUZ      | fuzzy homolog (Drosophila)                                                     |
| 223836_at    | 30.950 | FGFBP2   | fibroblast growth factor binding protein 2                                     |
| 228452_at    | 30.073 | C17orf39 | chromosome 17 open reading frame 39                                            |
| 213601_at    | 29.546 | SLIT1    | slit homolog 1 (Drosophila)                                                    |
| 209460_at    | 29.416 | ABAT     | 4-aminobutyrate aminotransferase                                               |
| 227440_at    | 29.364 | ANKS1B   | ankyrin repeat and sterile alpha motif domain containing 1B                    |
| 214456_x_at  | 29.333 | SAA1     | serum amyloid A1 /// serum amyloid A2                                          |
| 219877_at    | 28.122 | ZMAT4    | zinc finger, matrin type 4                                                     |
| 204856_at    | 27.277 | B3GNT3   | UDP-GlcNAc:betaGal beta-1,3-N-acetylglucosaminyltransferase 3                  |
| 224434_s_at  | 26.815 | MORG1    | mitogen-activated protein kinase organizer 1                                   |
| 239975_at    | 26.541 | HLA-DPB2 | major histocompatibility complex, class II, DP beta 2 (pseudogene)             |
| 216611_s_at  | 25.998 | SLC6A2   | solute carrier family 6 (neurotransmitter transporter, noradrenalin), member 2 |
| 219224_x_at  | 24.651 | ZNF408   | zinc finger protein 408                                                        |
| 203899_s_at  | 24.506 | CRCP     | CGRP receptor component                                                        |
| 202790_at    | 22.422 | CLDN7    | claudin 7                                                                      |
| 1553262_a_at | 22.360 | UTS2R    | urotensin 2 receptor                                                           |
| 217744_s_at  | 22.269 | PERP     | PERP, TP53 apoptosis effector                                                  |
| 207832_at    | 22.226 | BAIAP2   | BAI1-associated protein 2                                                      |
| 225244_at    | 21.746 | SNAP47   | synaptosomal-associated protein, 47kDa                                         |
| 229559_at    | 21.063 | FLJ40125 | hypothetical protein FLJ40125                                                  |
| 239159_at    | 20.610 | GOSR2    | Golgi SNARE (GS27)                                                             |
| 219472_at    | 20.126 | CENPO    | centromere protein O                                                           |
| 214625_s_at  | 19.020 | MINK1    | misshapen-like kinase 1 (zebrafish)                                            |
| 213981_at    | 18.956 | COMT     | catechol-O-methyltransferase                                                   |
| 213102_at    | 18.146 | ACTR3    | ARP3 actin-related protein 3 homolog (yeast)                                   |
| 230134_s_at  | 18.145 | RC3H2    | ring finger and CCCH-type zinc finger domains 2                                |
| stage        | 18.126 | STAGE    | _                                                                              |
| 1569631_at   | 17.832 | NMNAT1   | nicotinamide nucleotide adenylyltransferase 1                                  |
| 223248_at    | 17.219 | HSDL1    | hydroxysteroid dehydrogenase like 1                                            |
| 222208_s_at  | 16.768 | POLR2J4  | polymerase (RNA) II (DNA directed) polypeptide J4, pseudogene                  |

|             |        |            |                                                                                       |
|-------------|--------|------------|---------------------------------------------------------------------------------------|
| 205706_s_at | 16.644 | ANKRD26    | ankyrin repeat domain 26                                                              |
| 203099_s_at | 16.589 | CDYL       | chromodomain protein, Y-like                                                          |
| 230807_at   | 16.295 | CCDC151    | coiled-coil domain containing 151                                                     |
| 233550_s_at | 15.995 | SLC4A11    | solute carrier family 4, sodium borate transporter, member 11                         |
| 212688_at   | 15.840 | PIK3CB     | phosphoinositide-3-kinase, catalytic, beta polypeptide                                |
| 221610_s_at | 15.190 | STAP2      | signal transducing adaptor family member 2                                            |
| 217599_s_at | 14.945 | MDFIC      | MyoD family inhibitor domain containing                                               |
| 241354_at   | 14.740 | NCRNA00105 | non-protein coding RNA 105                                                            |
| 222392_x_at | 13.936 | PERP       | PERP, TP53 apoptosis effector                                                         |
| 239316_at   | 13.168 | LOC751071  | methyltransferase LOC751071, mitochondrial-like                                       |
| 223333_s_at | 11.924 | ANGPTL4    | angiopoietin-like 4                                                                   |
| 215689_s_at | 11.880 | SHBG       | sex hormone-binding globulin                                                          |
| 221854_at   | 11.823 | PKP1       | plakophilin 1 (ectodermal dysplasia/skin fragility syndrome)                          |
| 239012_at   | 10.451 | RNF144B    | CDNA FLJ59797 complete cds, highly similar to E3 ubiquitin ligase IBRDC2 (EC 6.3.2.-) |
| 219198_at   | 9.682  | GTF3C4     | general transcription factor IIIC, polypeptide 4, 90kDa                               |
| 213870_at   | 8.784  | COL11A2    | collagen, type XI, alpha 2                                                            |

## References (Supplemental Materials)

1. Irizarry RA, Hobbs B, Collin F, et al. Exploration, normalization, and summaries of high density oligonucleotide array probe level data. *Biostatistics* 2003;4(2):249-64.
2. Johnson WE, Li C, Rabinovic A. Adjusting batch effects in microarray expression data using empirical Bayes methods. *Biostatistics* 2007;8(1):118-27.
3. Reiner A, Yekutieli D, Benjamini Y. Identifying differentially expressed genes using false discovery rate controlling procedures. *Bioinformatics* 2003;19(3):368-75.
4. Farinha P, Masoudi H, Skinnider BF, et al. Analysis of multiple biomarkers shows that lymphoma-associated macrophage (LAM) content is an independent predictor of survival in follicular lymphoma (FL). *Blood* 2005;106(6):2169-74.



5. Krishnapuram B, Carin L, Figueiredo MA, Hartemink AJ. Sparse multinomial logistic regression: fast algorithms and generalization bounds. *IEEE Trans Pattern Anal Mach Intell* 2005;27(6):957-68.
6. Breiman L. Random Forests. *Machine Learning* 2001;45:5-32.
7. Lenz G, Wright G, Dave SS, et al. Stromal gene signatures in large-B-cell lymphomas. *N Engl J Med* 2008;359(22):2313-23.
8. Urs S, Smith C, Campbell B, et al. Gene expression profiling in human preadipocytes and adipocytes by microarray analysis. *J Nutr* 2004;134(4):762-70.
9. Duff MD, Mestre J, Maddali S, Yan ZP, Stapleton P, Daly JM. Analysis of gene expression in the tumor-associated macrophage. *J Surg Res* 2007;142(1):119-28.
10. Su AI, Wiltshire T, Batalov S, et al. A gene atlas of the mouse and human protein-encoding transcriptomes. *Proc Natl Acad Sci U S A* 2004;101(16):6062-7.
11. Sanchez-Aguilera A, Montalban C, de la Cueva P, et al. Tumor microenvironment and mitotic checkpoint are key factors in the outcome of classic Hodgkin lymphoma. *Blood* 2006;108(2):662-8.
12. Dave SS, Fu K, Wright GW, et al. Molecular diagnosis of Burkitt's lymphoma. *N Engl J Med* 2006;354(23):2431-42.
13. Lindstedt M, Lundberg K, Borrebaeck CA. Gene family clustering identifies functionally associated subsets of human in vivo blood and tonsillar dendritic cells. *J Immunol* 2005;175(8):4839-46.
14. Karube K, Ohshima K, Suzumiya J, Kawano R, Kikuchi M, Harada M. Gene expression profile of cytokines and chemokines in microdissected primary Hodgkin and

Reed-Sternberg (HRS) cells: high expression of interleukin-11 receptor alpha. *Ann Oncol* 2006;17(1):110-6.

15. Martinez FO, Gordon S, Locati M, Mantovani A. Transcriptional profiling of the human monocyte-to-macrophage differentiation and polarization: new molecules and patterns of gene expression. *J Immunol* 2006;177(10):7303-11.

16. Kang Y, Chen CR, Massague J. A self-enabling TGFbeta response coupled to stress signaling: Smad engages stress response factor ATF3 for Id1 repression in epithelial cells. *Mol Cell* 2003;11(4):915-26.
